# Supplementary material
Source: PubMed Central journal article supplement (PMC3761603)
Supplement: 1302730110_pnas.201302730SI.pdf [file 1302730110_pnas.201302730SI.pdf]

# Supporting Information

Soressi et al. 10.1073/pnas.1302730110

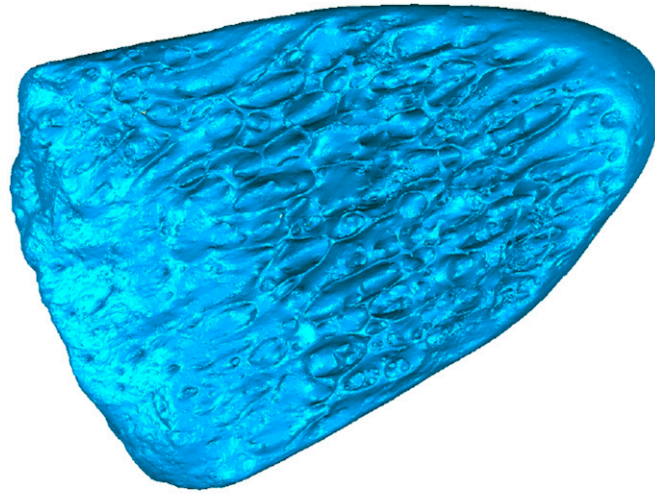

[Click for 3D](#) 

Fig. S1. Three-dimensional model of artifact AP-4209.

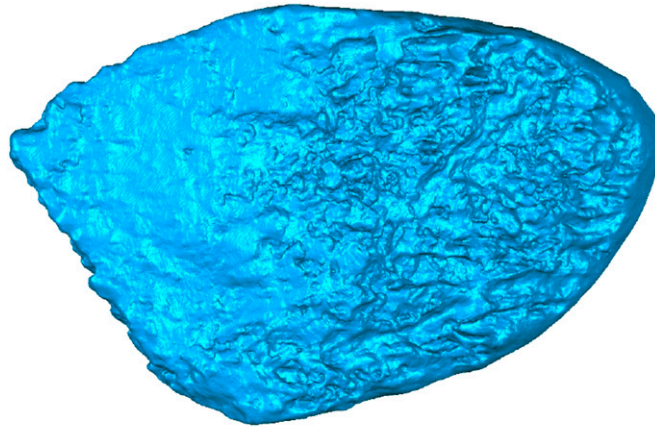

[Click for 3D](#) 

Fig. S2. Three-dimensional model of artifact AP-4493.

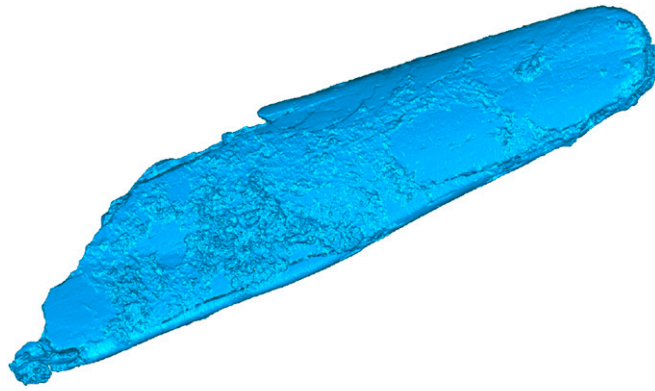

Click for 3D 

Fig. S3. Three-dimensional model of artifact AP-7839.

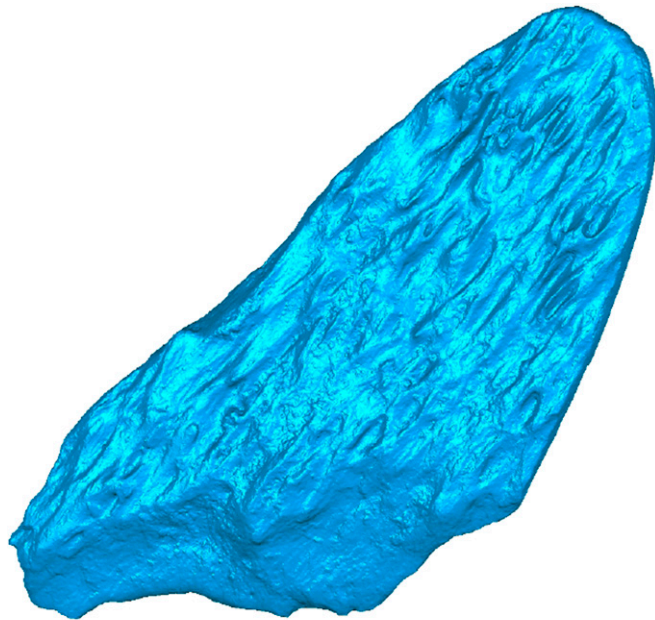

Click for 3D 

Fig. S4. Three-dimensional model of artifact G8-1417.

## Other Supporting Information Files

[SI Appendix \(PDF\)](#)
